# Supplementary material for: Synthesis of small size lead-free Cs3Bi2xSb2−2xBr9 solid-solutions using a spatially confined growth method for efficient photocatalytic CO2 reduction
Source: Royal Society of Chemistry journal article supplement (doi:10.1039/d3cy01459b), 2023-12-22
Supplement: d3cy01459b1.pdf [file d3cy01459b1.pdf]

## Supplementary Material

### **Synthesis of small size lead-free $\text{Cs}_3\text{Bi}_{2x}\text{Sb}_{2-2x}\text{Br}_9$ solid-solutions using a spatially confined growth method for efficient photocatalytic $\text{CO}_2$ reduction**

Miaomiao Gao <sup>a</sup>, Xiaolei Liu <sup>b,\*</sup>, Liwen Yin <sup>a</sup>, Jinghang Chen <sup>a</sup>, Zeyan Wang <sup>a</sup>, Zhaoke Zheng <sup>a</sup>, Yuanyuan Liu <sup>a</sup>, Hefeng Cheng <sup>a</sup>, Ying Dai <sup>a</sup>, Baibiao Huang <sup>a</sup>, Zehui Zhang <sup>c,\*</sup>, Peng Wang <sup>a,\*</sup>

<sup>a</sup> State Key Laboratory of Crystal Materials, Shandong University, Jinan, 250100, China

<sup>b</sup> Institute of Nanophotonics, Jinan University, Guangzhou, 511443, China

<sup>c</sup> College of Chemistry and Materials, South-Central Minzu University, Wuhan, 430074, China

\*Corresponding author:

E-mail: liuxiaolei@sdu.edu.cn (X. Liu)

E-mail: zehuizh@mail.ustc.edu.cn (Z. Zhang)

E-mail: pengwangicm@sdu.edu.cn (P. Wang)

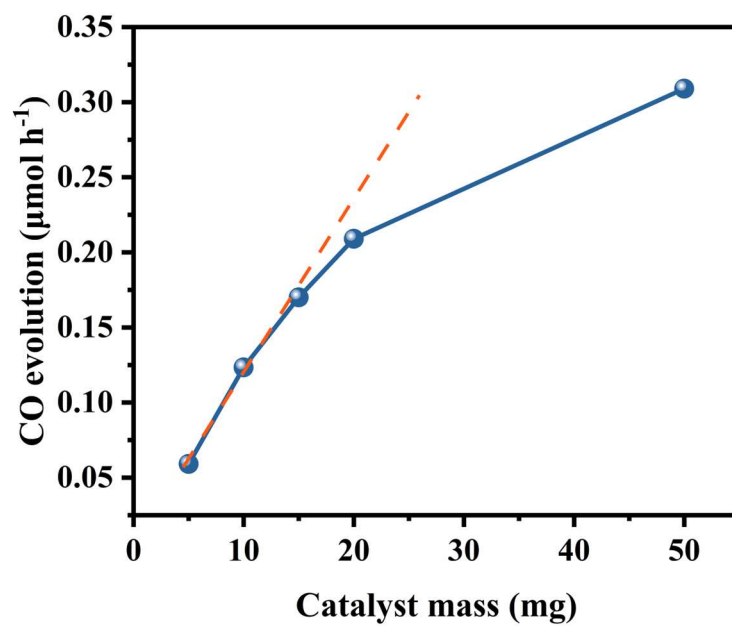

**Fig. S1.** Optimization of catalyst dosage.

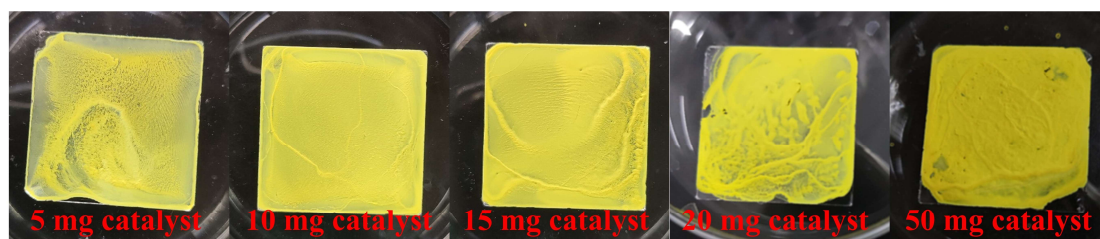

**Fig. S2.** The digital photographs of quartz sheets with different catalyst loading.

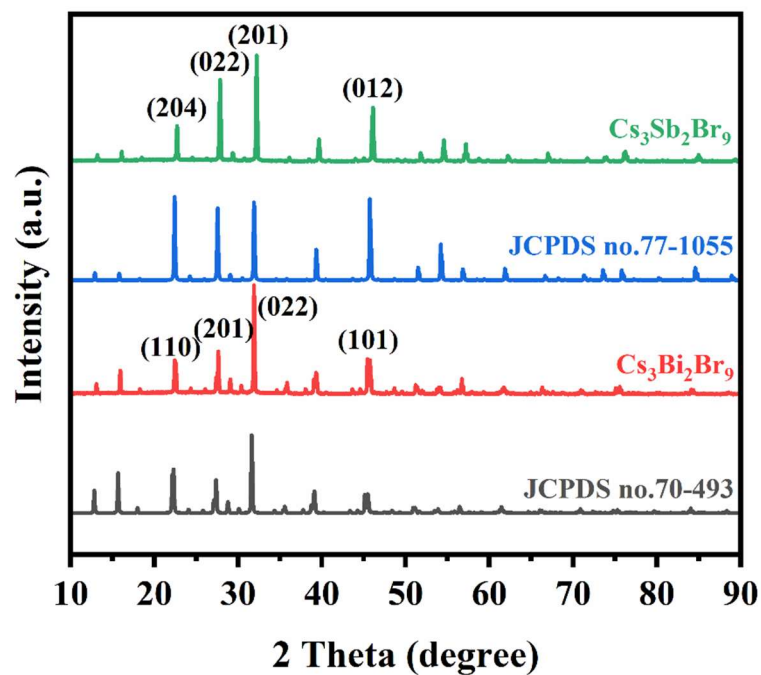

Fig. S3. XRD patterns of bulk CBB and CSB.

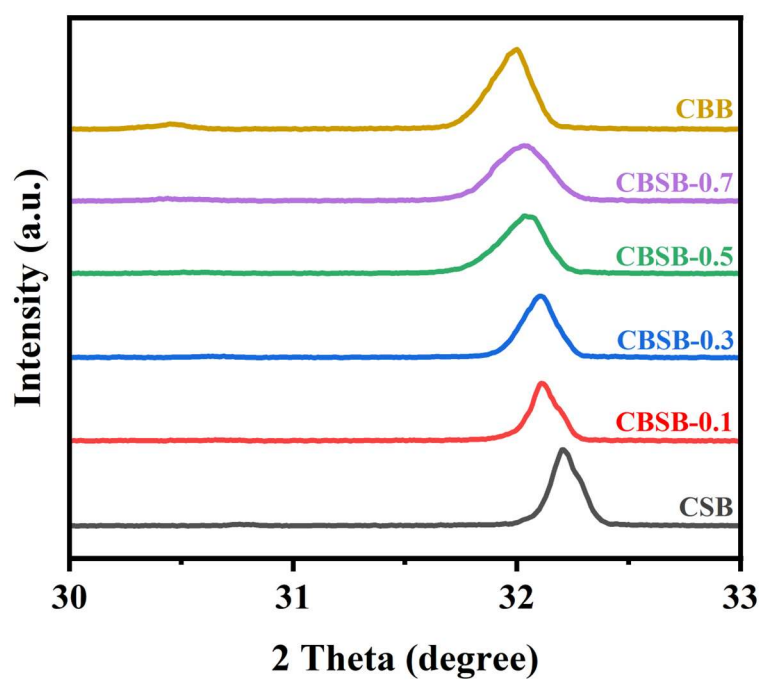

Fig. S4. The XRD patterns of bulk CBB, CSB and CBSB-X solid solutions (X = 0.1, 0.3, 0.5 and 0.7).

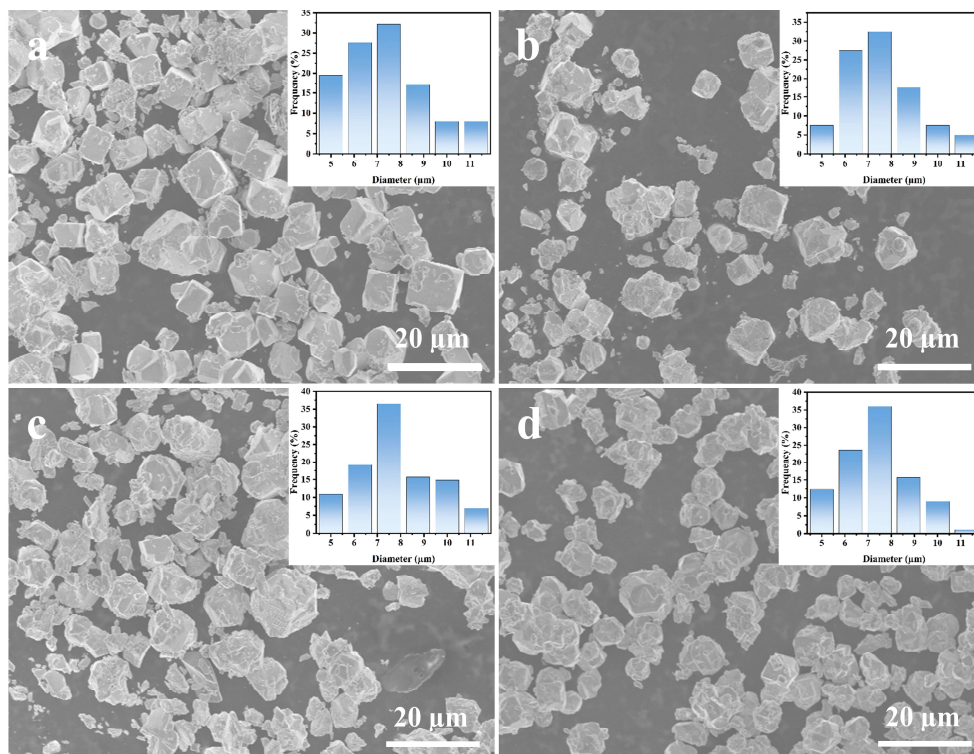

**Fig. S5.** SEM images of (a) CBSB-0.1, (b) CBSB-0.3, (c) CBSB-0.5, and (d) CBSB-0.7.

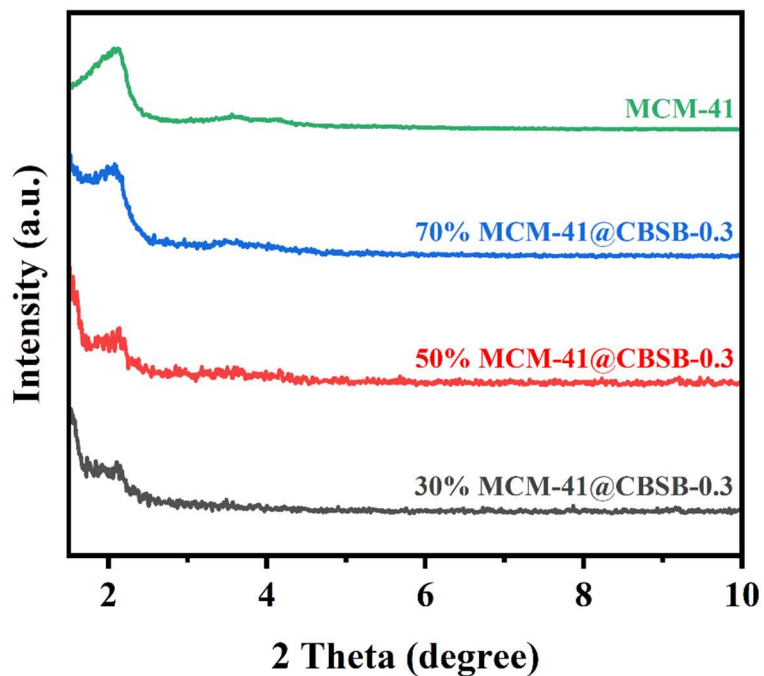

**Fig. S6.** The small-angle XRD patterns of the MCM-41 and a series of MCM-41@CBSB-0.3 with different weight ratios.

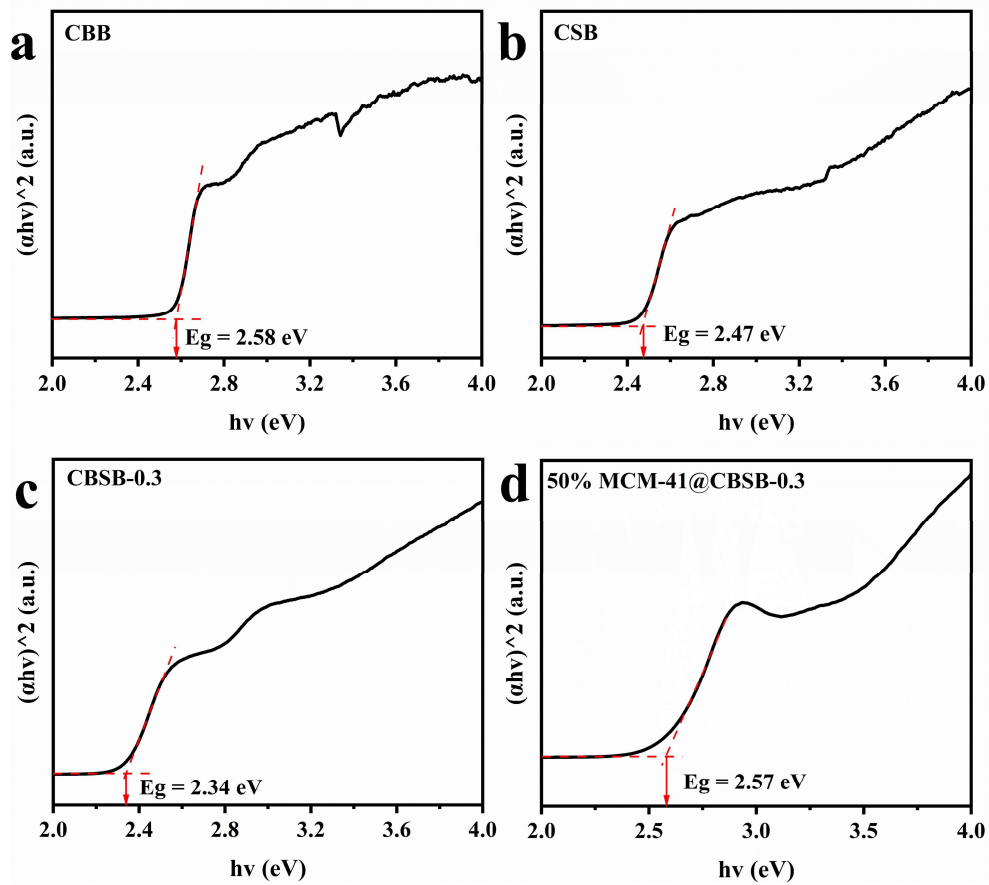

**Fig. S7.** The calculated optical absorption of bulk (a) CSB, (b) CBB, (c) CBSB-0.3, and (d) 50% MCM-41@CBSB-0.3.

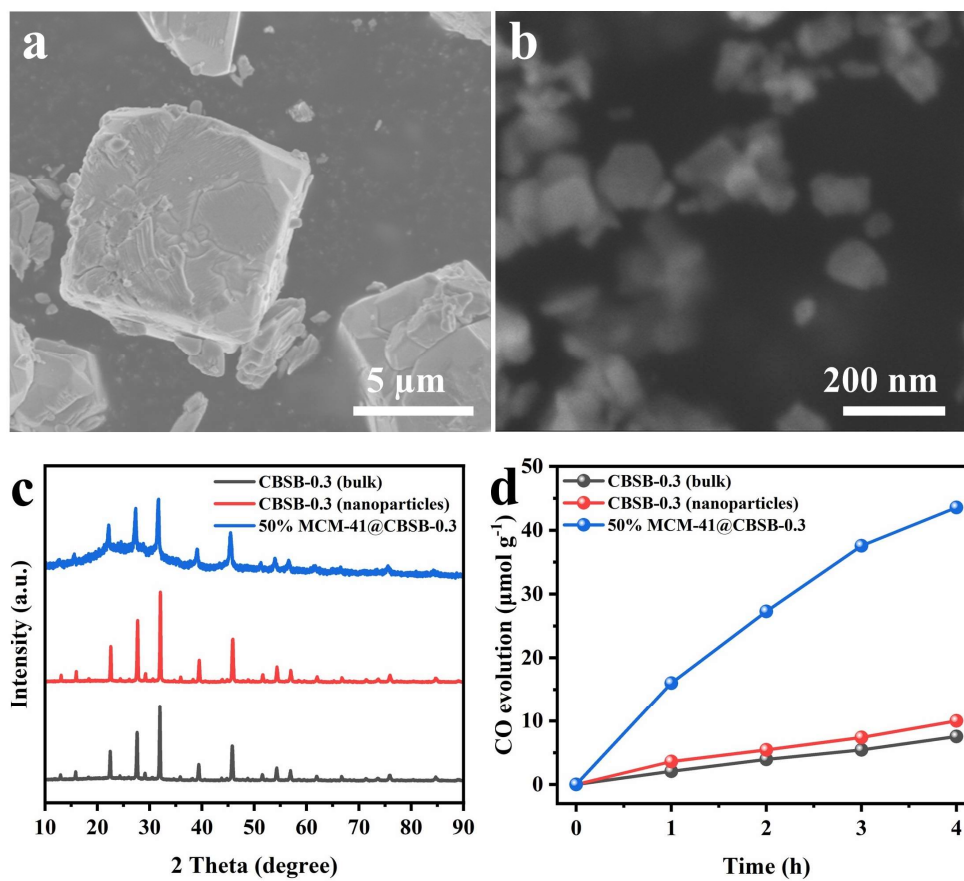

**Fig. S8.** SEM of (a) bulk CBSB-0.3 and (b) CBSB-0.3 nanoparticles. (c) The XRD patterns and (d) The photocatalytic performances of the bulk CBSB-0.3, CBSB-0.3 nanoparticles, and 50% MCM-41@CBSB-0.3.

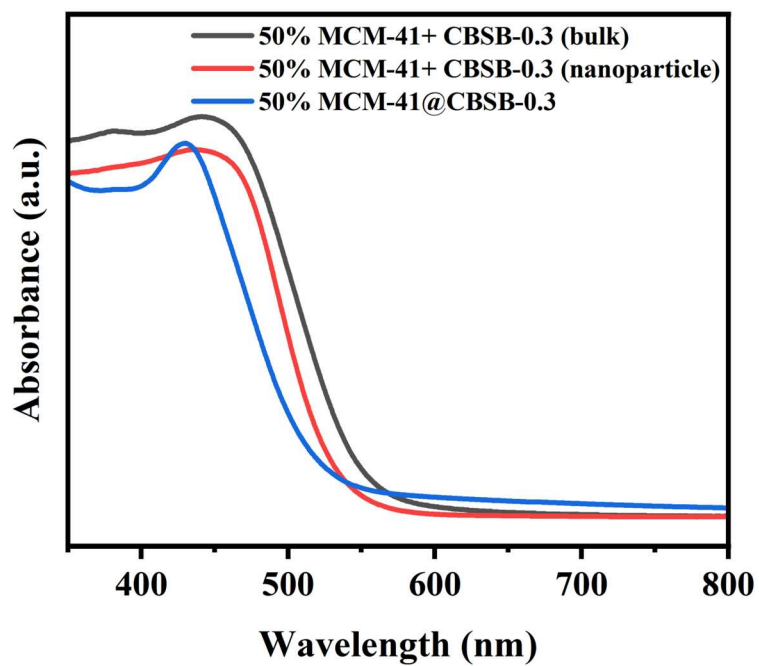

**Fig. S9.** UV-vis diffuse reflectance spectra of 50% MCM-41+CBSB-0.3 samples with different sizes.

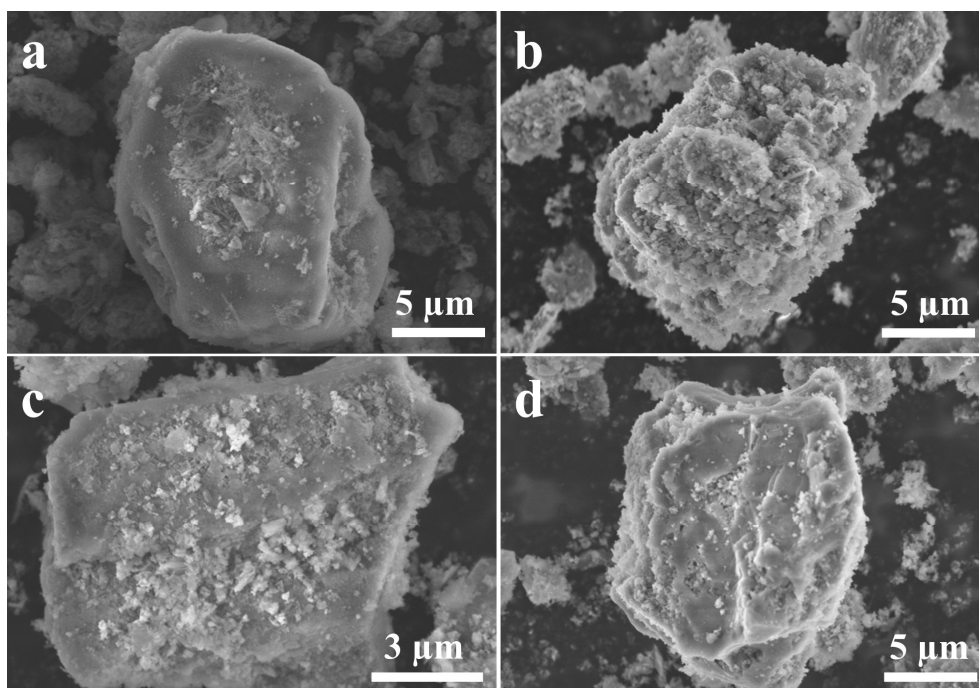

**Fig. S10.** SEM images of (a) MCM-41, (b) 30% MCM-41@CBSB-0.3, (c) 50% MCM-41@CBSB-0.3, (d) 70% MCM-41@CBSB-0.3.

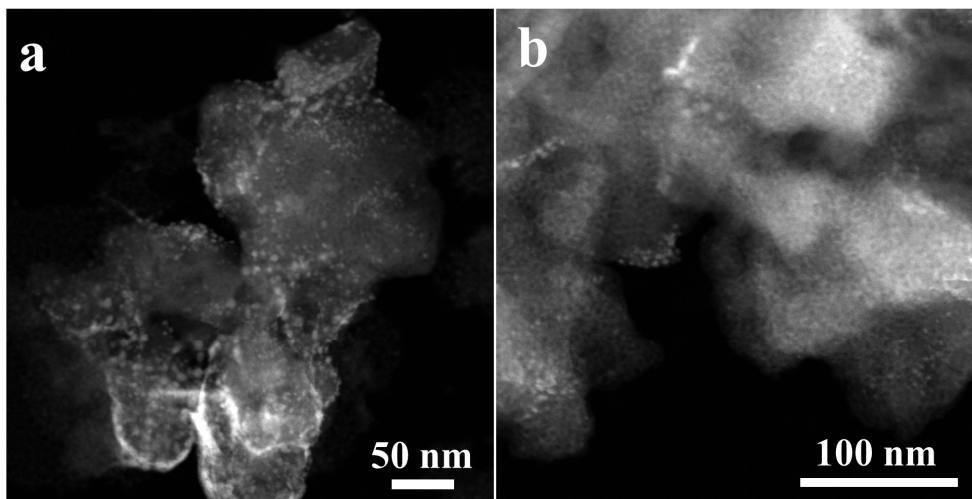

**Fig. S11.** TEM images of (a) 30% MCM-41@CBSB-0.3, (b) 70% MCM-41@CBSB-0.3.

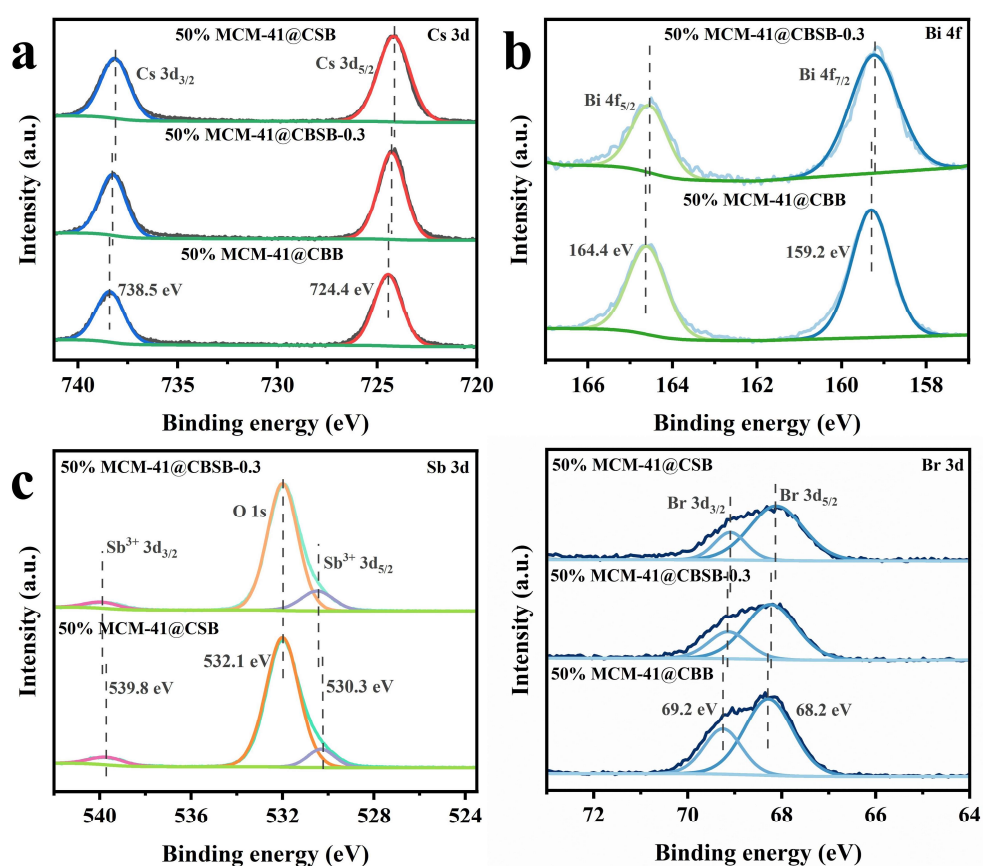

**Fig. S12.** The high-resolution XPS spectra of (a) Cs 3d, (b) Bi 4f, (c) Sb 3d, and (d) Br 3d of the 50% MCM-41@CBB, 50% MCM-41@CSB, and 50%



MCM-41@CBSB-0.3 samples.

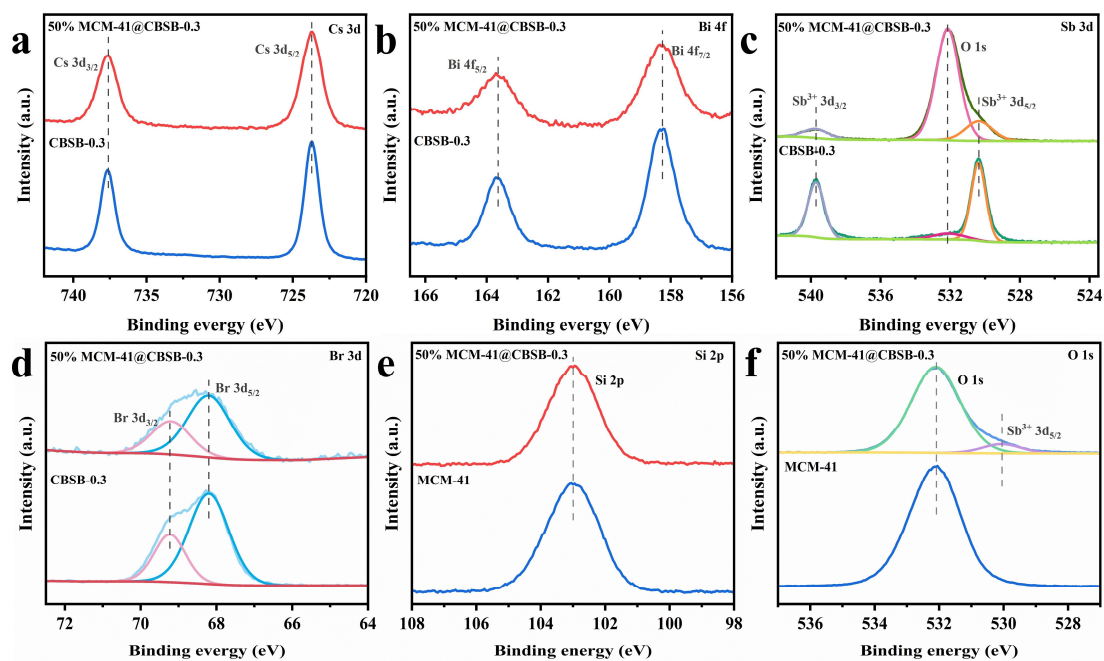

**Fig. S13.** The high-resolution XPS spectra of (a) Cs 3d, (b) Bi 4f, (c) Sb 3d, (d) Br 3d, (e) Si 2p, and (f) O 1s of MCM-41, bulk CBSB-0.3, and 50% MCM-41@CBSB-0.3.

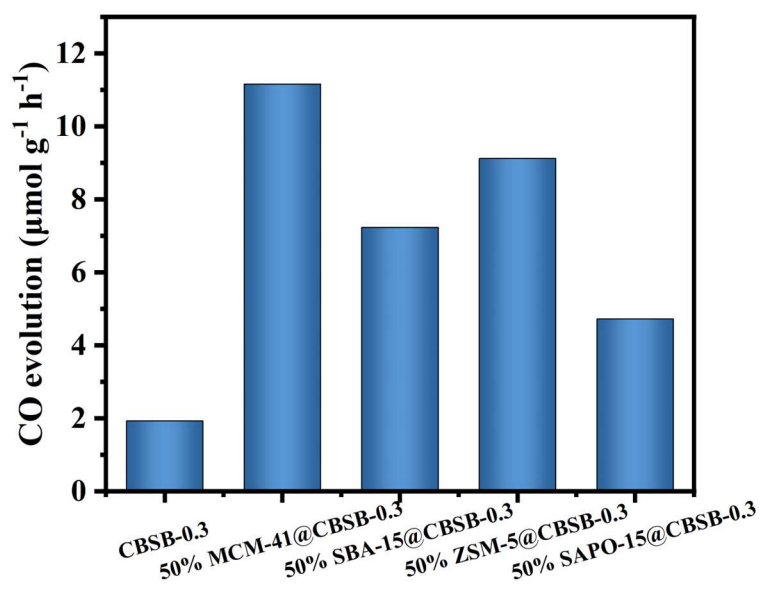

**Fig. S14.** The photocatalytic performance of CBSB-0.3 and series molecular sieves@CBSB-0.3.

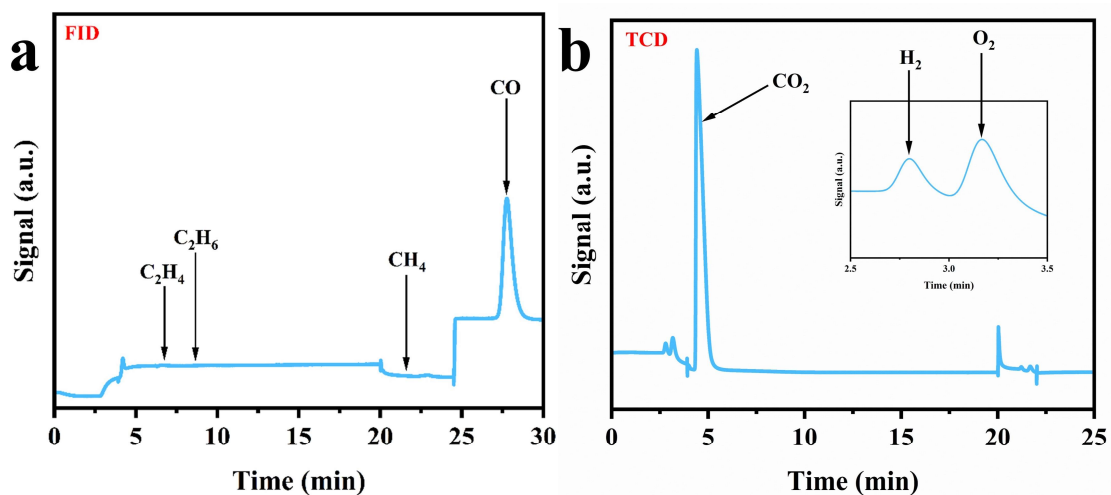

**Fig. S15.** Retention time distribution of different products detected by the thermal conductivity cell detector channel of GC after light irradiation for 4 h.

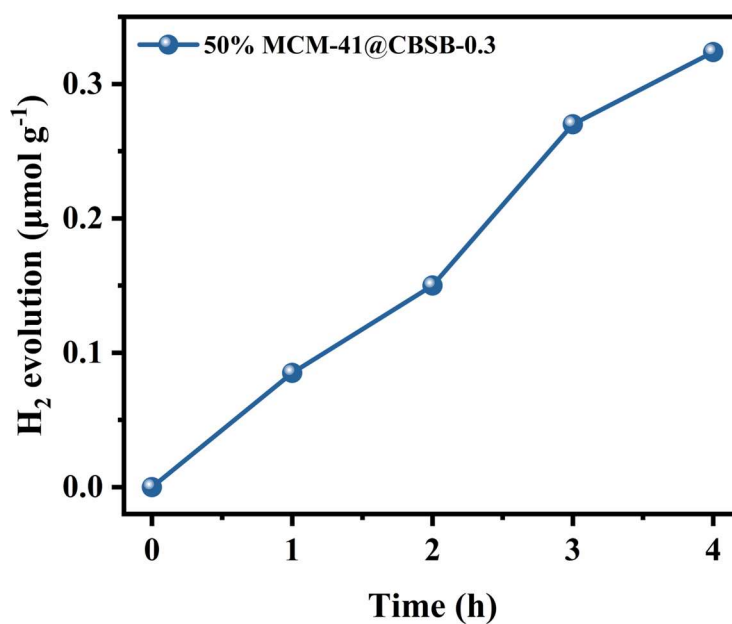

**Fig. S16.** H<sub>2</sub> production of 50% MCM-41@CBSB-0.3 during photocatalytic CO<sub>2</sub> reduction.

**Table S1.** Comparison of the specific surface areas and average pore sizes of CBSB-0.3, MCM-41, and a series of MCM-41@CBSB-0.3.

| Sample              | S <sub>BET</sub> (m <sup>2</sup> g <sup>-1</sup> ) | Average pore size (nm) |
|---------------------|----------------------------------------------------|------------------------|
| CBSB-0.3            | 3.8                                                | 14.4                   |
| 30% MCM-41@CBSB-0.3 | 181.9                                              | 3.3                    |
| 50% MCM-41@CBSB-0.3 | 220.3                                              | 3.4                    |
| 70% MCM-41@CBSB-0.3 | 506.1                                              | 2.9                    |
| MCM-41              | 817.6                                              | 2.4                    |

**Table S2.** Comparison of the photocatalytic CO<sub>2</sub> reduction reaction activity of reported photocatalysts under different reaction conditions.

| Catalysts                                                                       | Reaction conditions        | CO yield / $\mu\text{mol g}^{-1} \text{h}^{-1}$ | Light                        | Reference |
|---------------------------------------------------------------------------------|----------------------------|-------------------------------------------------|------------------------------|-----------|
| CsPbBr <sub>3</sub> Qd                                                          | ethyl acetate/water (0.3%) | 0.6                                             | AM 1.5G                      | [1]       |
| CsPbBr <sub>3</sub> @ZIF-67                                                     | Gas-solid                  | 0.77                                            | AM 1.5G                      | [2]       |
| CsAgBiBr <sub>6</sub>                                                           | Ethyl acetate              | 2.3                                             | AM 1.5G                      | [3]       |
| Cs <sub>3</sub> Bi <sub>2</sub> I <sub>9</sub>                                  | Gas-solid                  | 7.76                                            | UV, 305nm                    | [4]       |
| Fe(II)-doped CsPbBr <sub>3</sub>                                                | Gas-solid                  | 3.2                                             | Xe lamp                      | [5]       |
| Cs <sub>3</sub> Bi <sub>2</sub> I <sub>9</sub> /Bi <sub>2</sub> WO <sub>6</sub> | Gas-solid                  | 7.3                                             | Xe lamp                      | [6]       |
| g-C <sub>3</sub> N <sub>4</sub> /BiVO <sub>4</sub>                              | Gas-solid                  | 1.75                                            | Xe lamp, $\geq 400\text{nm}$ | [7]       |
| NiAl <sub>2</sub> O <sub>4</sub> /g-C <sub>3</sub> N <sub>4</sub>               | Gas-solid                  | 10.73                                           | Xe lamp                      | [8]       |
| BiO <sub>1-x</sub> Br/g-C <sub>3</sub> N <sub>4</sub>                           | Water                      | 13.11                                           | Xe lamp, $\geq 420\text{nm}$ | [9]       |
| 50% MCM-41@CBSB-0.3                                                             | Gas-solid                  | 11.2                                            | Xe lamp, $>420\text{nm}$     | This work |

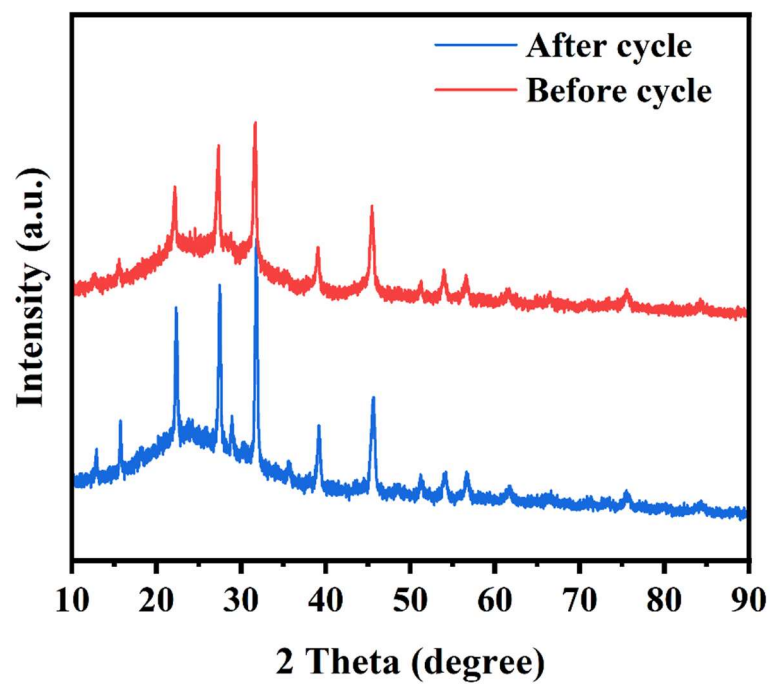

**Fig. S17.** Comparison of XRD patterns of 50% MCM-41@CBSB-0.3 sample before and after cycling reaction.

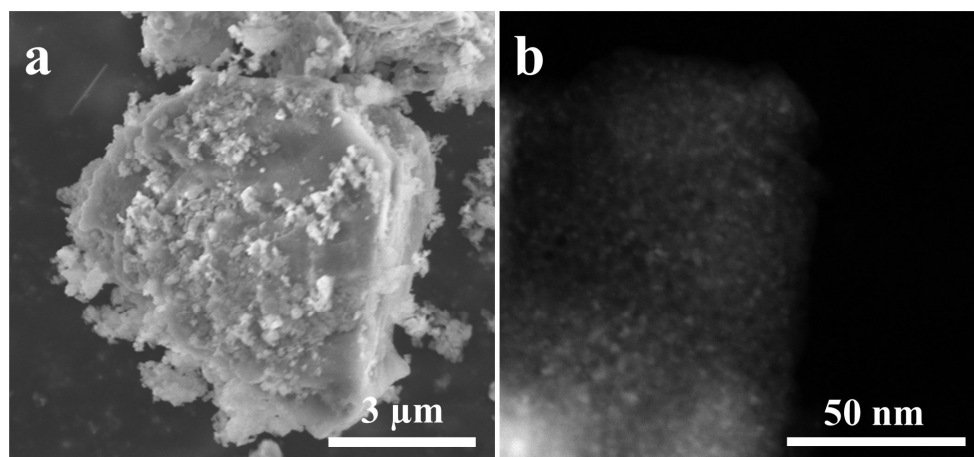

**Fig. S18.** (a) SEM images and (b) TEM images of 50% MCM-41@CBSB-0.3 after cycle.

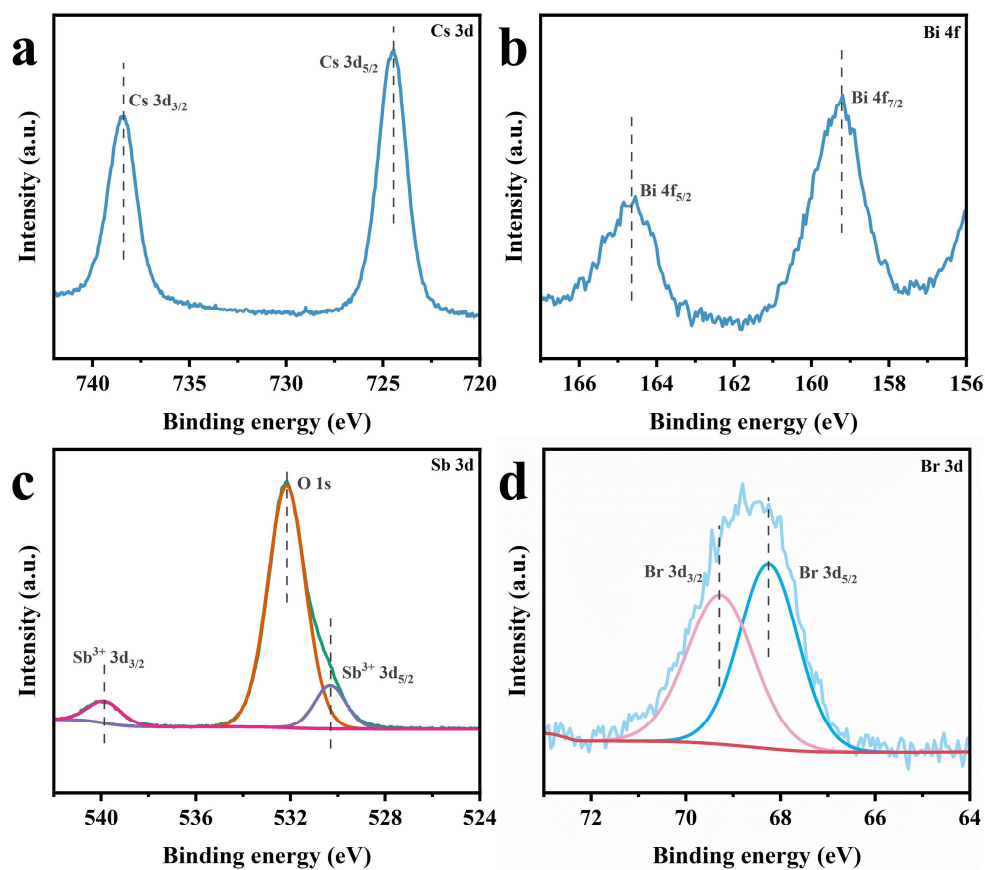

**Fig. S19.** XPS spectra of (a) Cs 3d, (b) Bi 4f, (c) Sb, and (d) Br 3d of 50% MCM-41@CBSB-0.3 after cycle.

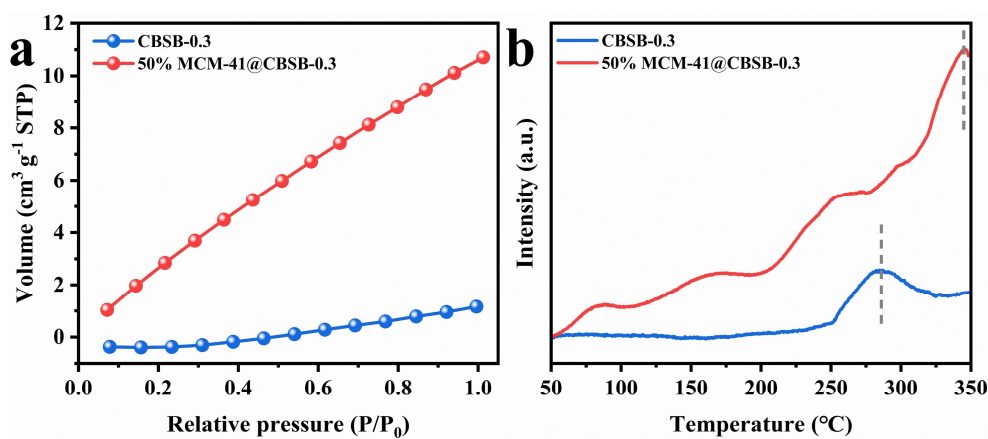

**Fig. S20.** (a) The CO<sub>2</sub> adsorption isotherm curves of MCM-41, CBSB-0.3, and 50% MCM-41@CBSB-0.3. (b) CO<sub>2</sub>-TPD of CBSB-0.3 and 50% MCM-41@CBSB-0.3.

**Table S3.** Fitted PL decay parameters of CBSB-0.3 and 50% MCM-41@CBSB-0.3.

| Sample              | B <sub>1</sub> | $\tau_1$ (ns) | B <sub>2</sub> | $\tau_2$ (ns) | $\tau_{\text{average}}$ (ns) |
|---------------------|----------------|---------------|----------------|---------------|------------------------------|
| CBSB-0.3            | 881.53         | 1.39          | 46.08          | 9.79          | 1.81                         |
| 50% MCM-41@CBSB-0.3 | 51.34          | 1.63          | 955.72         | 1.91          | 2.64                         |

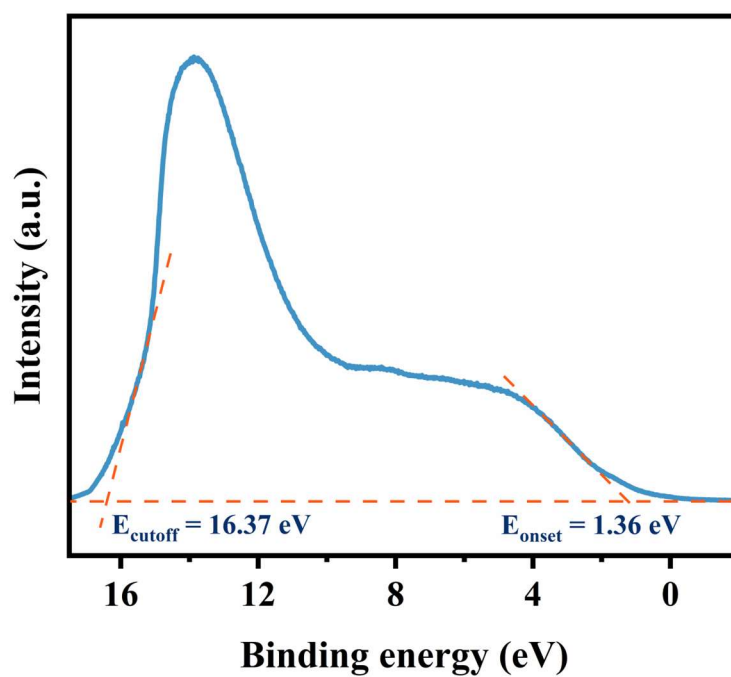

**Fig. S21.** UPS valence band spectra of 50% MCM-41@CBSB-0.3.

## Reference

- [1] J. Hou, S. Cao, Y. Wu, Z. Gao, F. Liang, Y. Sun, Z. Lin and L. Sun, *Chemistry*, 2017, **23**, 9481.
- [2] Z.C. Kong, J.F. Liao, Y.J. Dong, Y.F. Xu, H.Y. Chen, D.B. Kuang and C.Y. Su, *ACS Energy. Lett.*, 2018, **3**, 2656-2662.
- [3] L. Zhou, Y.F. Xu, B.X. Chen, D.B. Kuang and C.Y. Su, *Small*, 2018, **14**, 1703762.
- [4] Y.Y. Wang, Q.X. Zhou, Y.F. Zhu and D.S. Xu, *Appl. Catal. B Environ.*, 2021, **294**, 120236.
- [5] S. Shyamal, S.K. Dutta and N. Pradhan, *J. Phys. Chem. Lett.*, 2019, **10**, 7965-7969.
- [6] Z.L. Liu, R.R. Liu, Y.F. Mu, Y.X. Feng, G.X. Dong, M. Zhang and T.B. Lu, *Sol. Rrl.*, 2021, **5**, 2000691.
- [7] G. Zhou, L. Meng, X. Ning, W. Yin, J. Hou, Q. Xu, J. Yi, S. Wang and X. Wang, *Intl. J. Hydrog. Energy.*, 2022, **47**, 8749-8760.
- [8] N. Ahmad, C. J. Kuo, M. Mustaqeem, M. K. Hussien and K. Chen, *Mater. Today. Phys.*, 2023, **31**, 100965.
- [9] X. M. Jia, H. Y. Sun, H. L. Lin, J. Cao, C. Hu and S. F. Chen, *Appl. Surf. Sci.*, 2023, **614** 156017.
